# Supplementary material for: The realization of a high thermoelectric figure of merit in Ge-substituted β-Zn4Sb3 through band structure modification
Source: Royal Society of Chemistry journal article supplement (doi:10.1039/c2jm30906h), 2012-01-01
Supplement: c2jm30906h.pdf [file c2jm30906h.pdf]

Supporting Information for

## The realization of high thermoelectric figure of merit in Ge-substituted $\beta$ - $\text{Zn}_4\text{Sb}_3$ through band structure modification

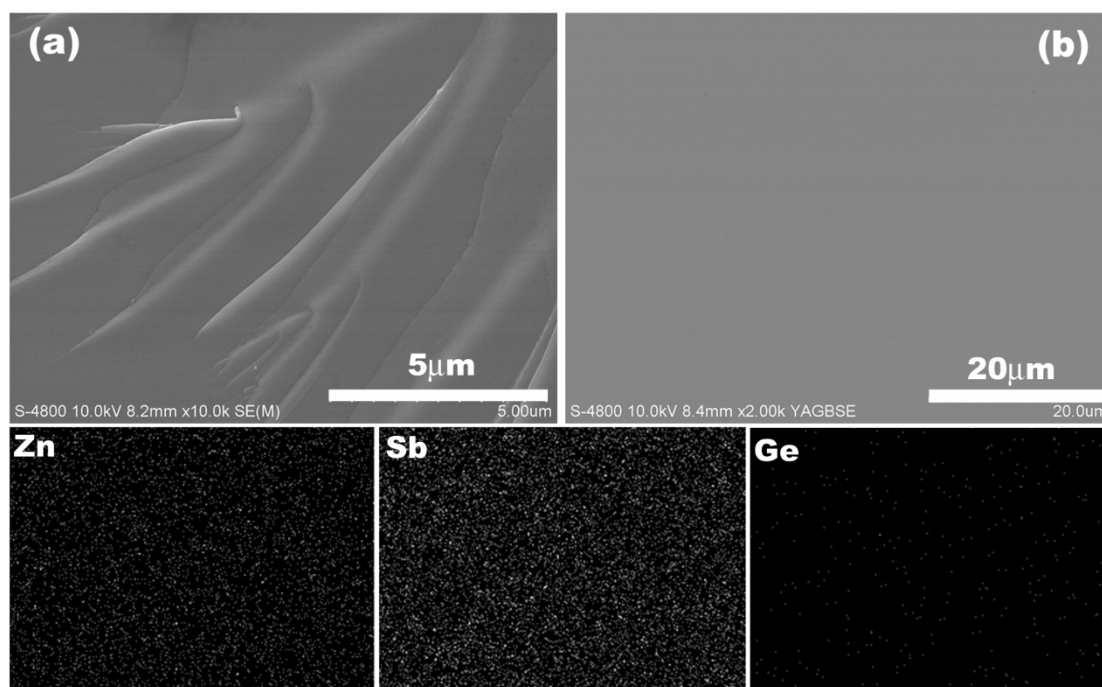

Fig. S1 (a) The secondary electron image and (b) back scattering image of  $x=0.0025$  sample. The elemental distribution maps of Zn, Sb, Ge are also shown which indicate a dense and homogeneous microstructure and composition.
